# Supplementary material for: Neurodegeneration and Cancer: Where the Disorder Prevails
Source: PubMed Central journal article supplement (PMC4615981; doi:10.1038/srep15390), 2015-10-23
Supplement: srep15390-s1.pdf [file srep15390-s1.pdf]

# Supplementary Information of

## Neurodegeneration and Cancer: Where the Disorder Prevails

Petr Klus<sup>1,2</sup>, Davide Cirillo<sup>1,2</sup>, Teresa Botta Orfila<sup>1,2</sup> and  
Gian Gaetano Tartaglia<sup>1,2,3,\*</sup>

<sup>1</sup> Centre for Genomic Regulation (CRG), Dr Aiguader 88, 08003 Barcelona, Spain.

<sup>2</sup> Universitat Pompeu Fabra (UPF), 08003 Barcelona, Spain

<sup>3</sup> Institució Catalana de Recerca i Estudis Avançats (ICREA), 23 Passeig Lluís Companys, 08010 Barcelona, Spain

\* Corresponding Author. Tel: +34 933160116; Fax: +34 933969983; Email: gian.tartaglia@crg.eu

### **CDS diseases (abundance and structural disorder)**

#### **AD\_DOWN (positive) vs AD\_UP (negative)**

<http://www.tartaglialab.com/boxplotter/view/629/a6f02b1232/>

#### **PD\_DOWN (pos) vs PD\_UP (neg)**

<http://www.tartaglialab.com/boxplotter/view/631/c68cb71821/>

#### **SCZ\_DOWN (pos) vs. SCZ\_UP (neg)**

<http://www.tartaglialab.com/boxplotter/view/636/23064d250f/>

### **Cancers (abundance and nucleic-acid binding propensity)**

#### **CRC\_DOWN (pos) vs. CRC\_UP (neg)**

<http://www.tartaglialab.com/boxplotter/view/643/8e2fd086a3/>

#### **LC\_DOWN (pos) vs. LC\_UP (neg)**

<http://www.tartaglialab.com/boxplotter/view/644/c70a66dc46/>

#### **PC\_DOWN (pos) vs. PC\_UP (neg)**

<http://www.tartaglialab.com/boxplotter/view/639/0f2a9ac422/>

**Table S1.** *Protein abundance analysis.* We provide links to the statistical analysis of genes sets performed with *boxplotter* (<http://www.tartaglialab.com/boxplotter/submit>)

A

| Positive / Negative | R-AD (DOWN) | R-AD (UP) | R-PD (DOWN) | R-PD (UP) | R-SCZ (DOWN) | R-SCZ (UP) |
|---------------------|-------------|-----------|-------------|-----------|--------------|------------|
| CRC (DOWN)          | ●           | ●         | ●           | ●         | ●            | ●          |
| CRC (UP)            | ●           | ●         | ●           | ●         | ●            | ●          |
| LC (DOWN)           | ●           | ●         | ●           | ●         | ●            | ●          |
| LC (UP)             | ●           | ●         | ●           | ●         | ●            | ●          |
| PC (DOWN)           | ●           | ●         | ●           | ●         | ●            | ●          |
| PC (UP)             | ●           | ●         | ●           | ●         | ●            | ●          |

Structural Disorder

B

| Positive / Negative | AD (DOWN) | AD (UP) | PD (DOWN) | PD (UP) | SCZ (DOWN) | SCZ (UP) |
|---------------------|-----------|---------|-----------|---------|------------|----------|
| R-CRC (DOWN)        | ●         | ●       | ●         | ●       | ●          | ●        |
| R-CRC (UP)          | ●         | ●       | ●         | ●       | ●          | ●        |
| R-LC (DOWN)         | ●         | ●       | ●         | ●       | ●          | ●        |
| R-LC (UP)           | ●         | ●       | ●         | ●       | ●          | ●        |
| R-PC (DOWN)         | ●         | ●       | ●         | ●       | ●          | ●        |
| R-PC (UP)           | ●         | ●       | ●         | ●       | ●          | ●        |

Structural Disorder

**Figure S1.** *Enrichments in structural disorder propensities.* We used random sets of genes to measure the signal strength of structural disordered propensities for A) Cancers B) CNS diseases.

| FileA/FileB | AD (DOWN)                                                                                | AD (UP)                                                                                  |
|-------------|------------------------------------------------------------------------------------------|------------------------------------------------------------------------------------------|
| CRC (DOWN)  |  N 0.90 |  P 0.60 |
| CRC (UP)    |         |  P 0.76 |
| LC (DOWN)   |  N 0.79 |  P 0.71 |
| LC (UP)     |  N 0.77 |  P 0.71 |
| PC (DOWN)   |  N 0.80 |  P 0.56 |
| PC (UP)     |  N 0.83 |  P 0.71 |

**Figure S2.** *Classification of proteins binding to amyloid fibrils.* Proteins interacting with amyloid fibrils are physico-chemically similar to those overexpressed in Alzheimer's disease, in agreement with experimental findings.
